# Supplementary material for: Treatment of Acute Respiratory Distress Syndrome Caused by COVID-19 with Human Umbilical Cord Mesenchymal Stem Cells
Source: MDPI journal article supplement (doi:10.3390/ijms24054435), 2023-02-23
Supplement: s1 [file s1]

## *Supplementary Material*

**Supplementary Table S2:** Primer sequences used for miRNAs detection.

| Name            | Sequence for            | Sequence rev                            |
|-----------------|-------------------------|-----------------------------------------|
| hsa-miR-21-5p   | TAGCTTATCAGACTGATGTTGA  | Universal reverse primer (kit provided) |
| hsa-miR-27a-3p  | TTCACAGTGGCTAAGTTCCGC   |                                         |
| hsa-miR-126-3p  | TCGTACCGTGAGTAATAATGCG  |                                         |
| hsa-miR-133a-3p | TTTGGTCCCCTTCAACCAGCTG  |                                         |
| hsa-miR-146a-5p | TGAGAACTGAATTCCATGGGTT  |                                         |
| hsa-miR-221-3p  | AGCTACATTGTCTGCTGGGTTTC |                                         |
| hsa-miR-92a-3p  | TATTGCACTTGTCCCGGCCTGT  |                                         |
| has-miR-124-3p  | TAAGGCACGCGGTGAATGCCAA  |                                         |
| hsa-miR-424a-5p | CAGCAGCAATTCATGTTTTGAA  |                                         |
| U6              | CTCGCTTCGGCAGCACA       | AACGCTTCACGAATTTGCGT                    |
