# Supplementary material for: Treatment of Acute Respiratory Distress Syndrome Caused by COVID-19 with Human Umbilical Cord Mesenchymal Stem Cells
Source: MDPI journal article supplement (doi:10.3390/ijms24054435), 2023-02-23
Supplement: s1 [file s1]

## Supplementary Material

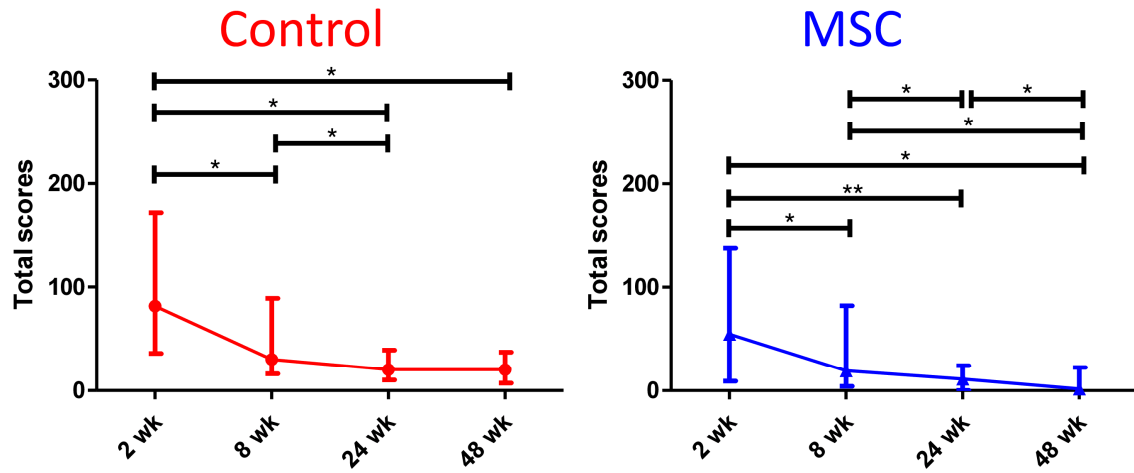

**Supplementary Figure S1.** Dynamic changes in lung CT scores in patients with COVID-19. Data are presented as a median and IQR. Paired t-test was used for comparing related values of time-depending events: \*,  $p \leq 0.05$ ; \*\*,  $p \leq 0.01$ . The red line represents the Control group; the blue line represents the MSC group.

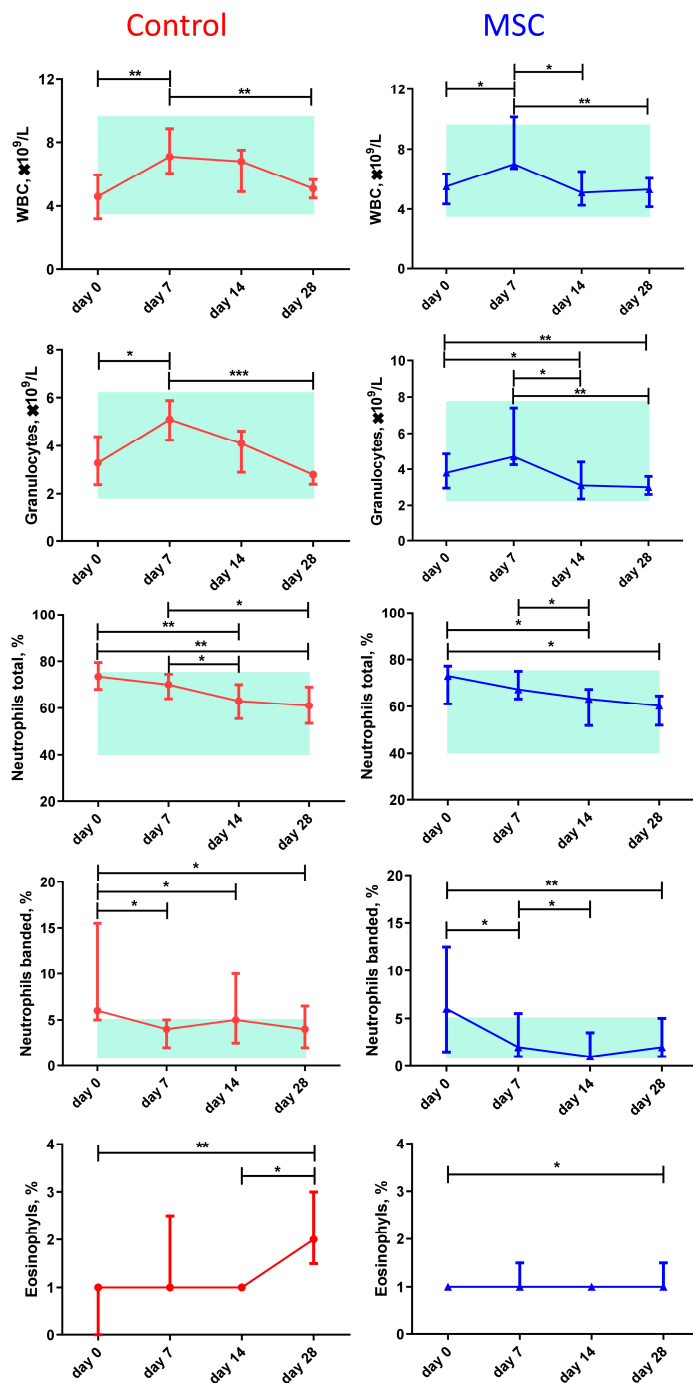

**Supplementary Figure S2.** Dynamic changes in in hematological parameters in patients with COVID-19. A light green rectangle denotes the normal range. Data are presented as the median and interquartile range. Wilcoxon signed-rank test: \*,  $p \leq 0.05$ ; \*\*,  $p \leq 0.01$ ; \*\*\*,  $p \leq 0.001$ . WBC, white blood cells; ESR, erythrocyte sedimentation rate. The red line represents the Control group; the blue line represents the MSC group.

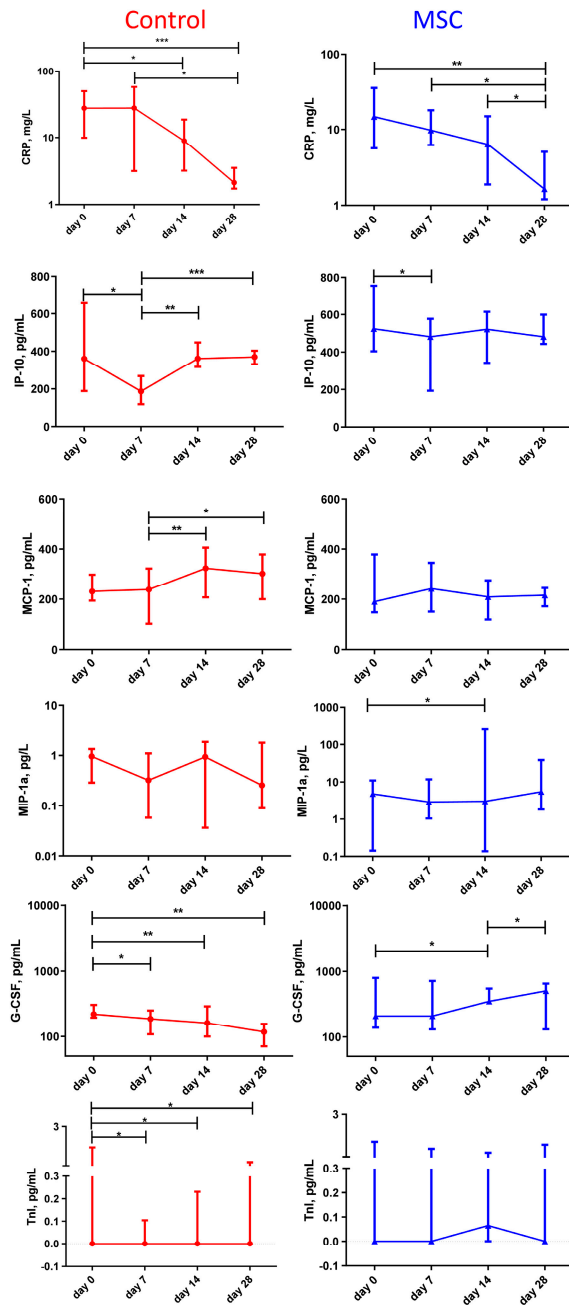

**Supplementary Figure S3.** Dynamic changes in cytokine levels in patients with COVID-19. Data are presented as a median and interquartile range. Wilcoxon signed-rank test for comparing time-dependent events: \*,  $p \leq 0.05$ ; \*\*,  $p \leq 0.01$ ; \*\*\*,  $p \leq 0.001$ . The red line represents the Control group; the blue line represents the MSC group. CRP, C-reactive protein; IP-10, Interferon gamma-induced protein 10; MCP-1, Monocyte chemoattractant protein-1; MIP-1 $\alpha$ , Macrophage Inflammatory Protein-1 Alpha; G-CSF, Granulocyte colony-stimulating factor; IL-10, interleukin 10; IL-2, interleukin 2; IL-6, interleukin 6; NT-proBNP, N-terminal prohormone of brain natriuretic peptide; TnI, troponin I; SP-D, surfactant D; RAGE, receptor for advanced glycation endproducts.

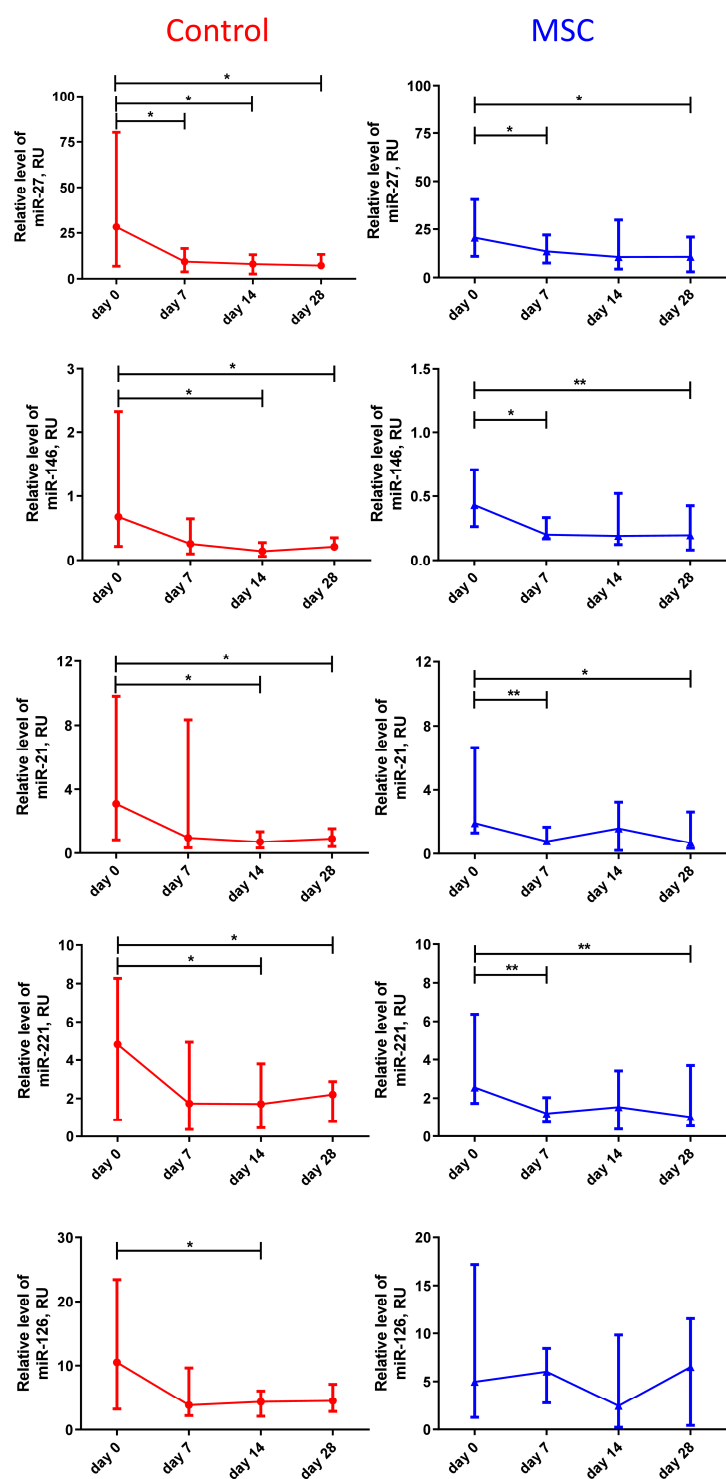

**Supplementary Figure S4.** Dynamic changes in miRNAs expression level in patients with COVID-19. Data are presented as a median and IQR. Wilcoxon signed-rank test for comparing time-dependent events: \*,  $p \leq 0.05$ ; \*\*,  $p \leq 0.01$ . The red line represents the Control group; the blue line represents the MSC group.

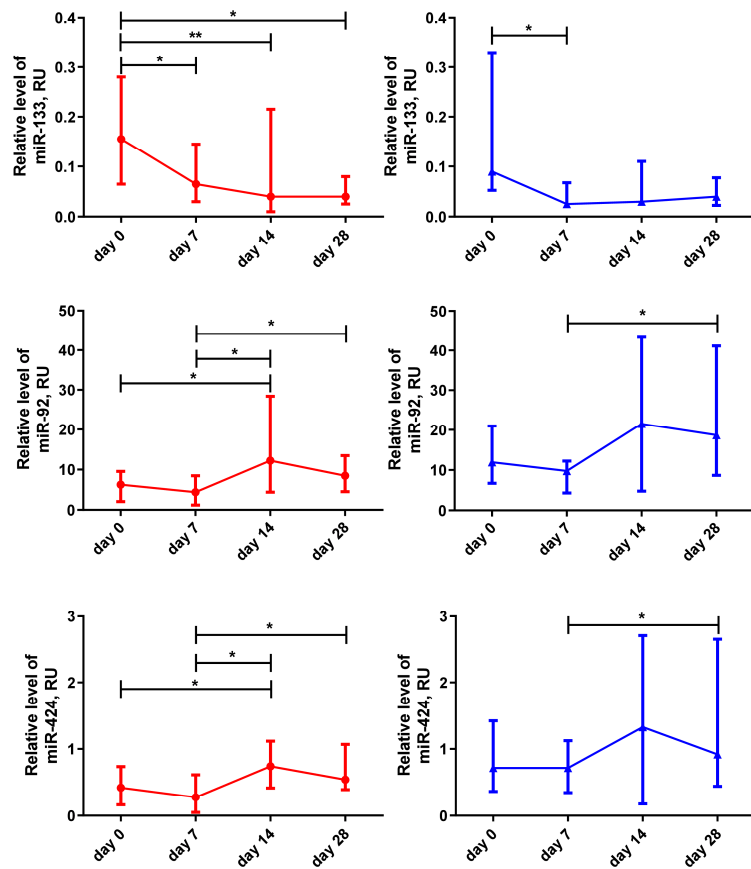

**Supplementary Figure S4 (continued).** Dynamic changes in miRNAs expression level in patients with COVID-19. Data are presented as a median and IQR. Wilcoxon signed-rank test for comparing time-dependent events: \*,  $p \leq 0.05$ ; \*\*,  $p \leq 0.01$ . The red line represents the Control group; the blue line represents the MSC group.

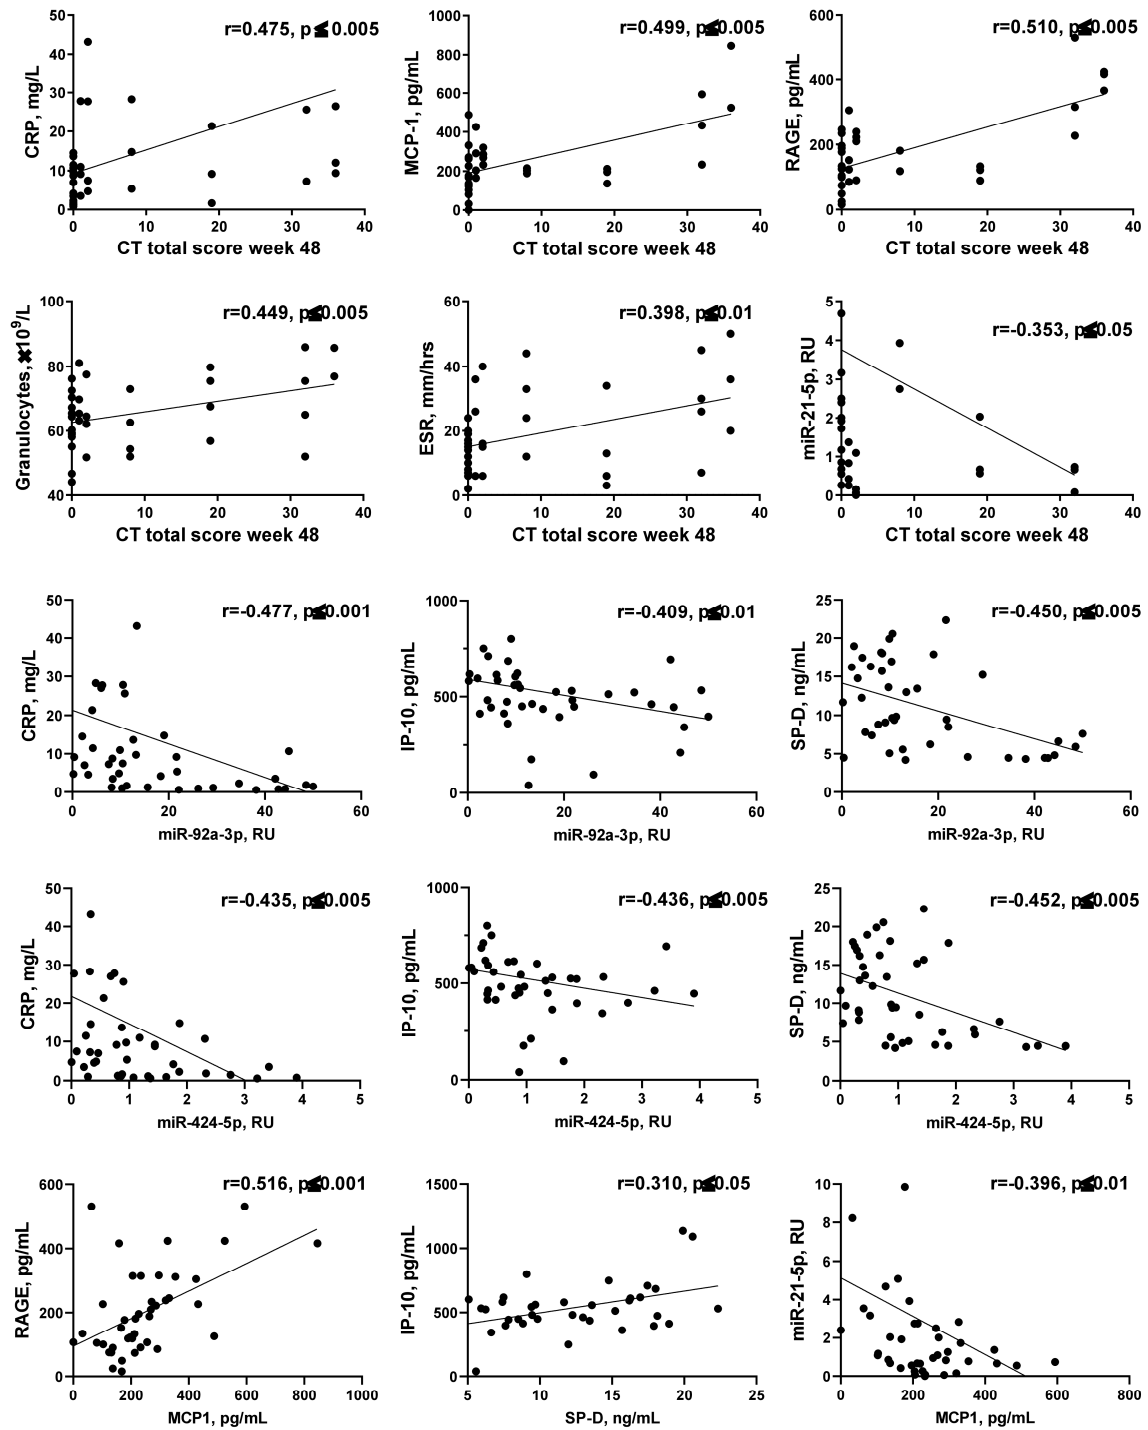

**Supplementary Figure S5.** Some correlation between lung CT total scores, blood parameters, cytokines, and miRNA in COVID-19 patients. All data on the correlation analysis are available in Table S1.

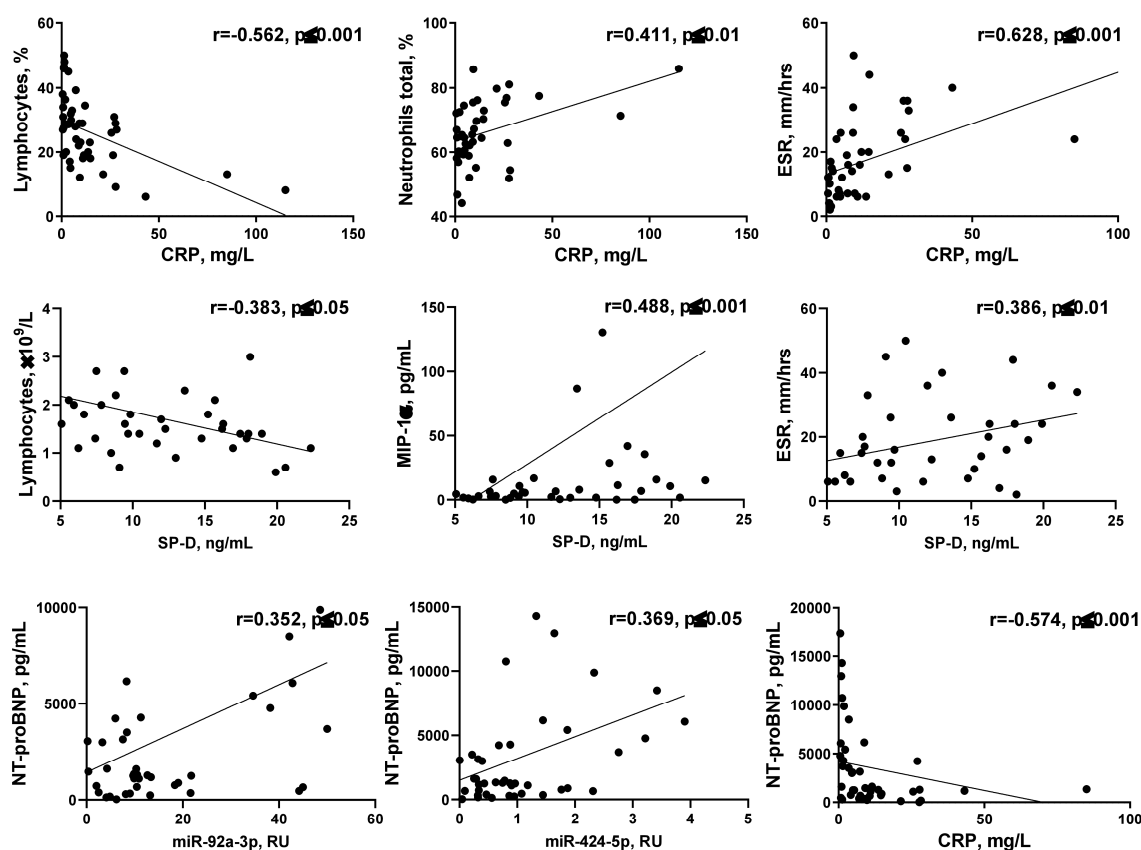

**Supplementary Figure S5 (continued).** Some correlation between lymphocyte subsets, cytokines, and miRNA in COVID-19 patients. All data on the correlation analysis are available in **Table S1**.

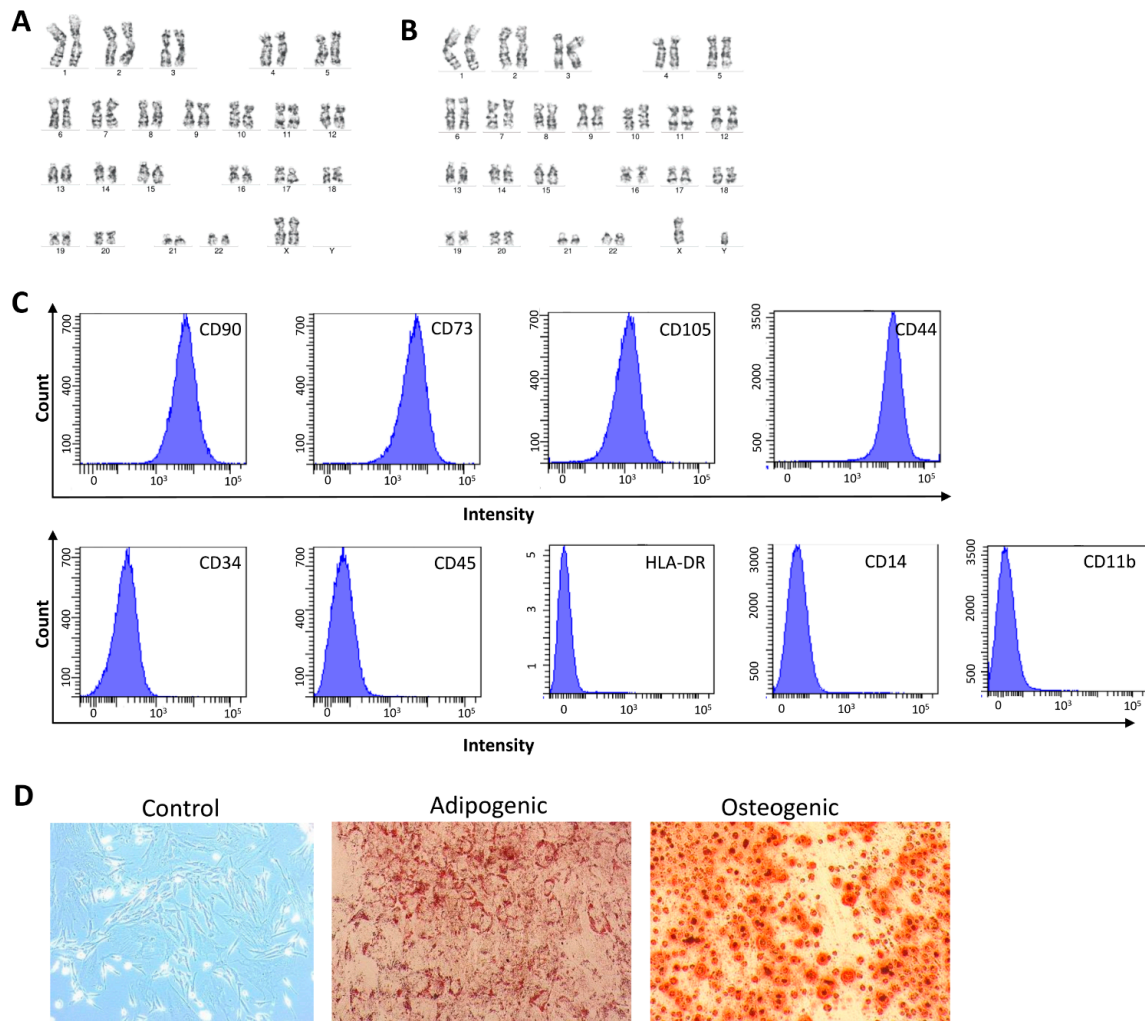

**Supplementary Figure S6.** Characteristics of UC-MSCs. A representative example of normal female (A) and male (B) karyotype of a UC-MSCs line at P. (C), UC-MSCs were positive for CD90, CD73, CD105 and negative for CD34 and CD45 at P3. (D), Abundance of lipid vacuoles and single nodules of extracellular calcium matrix were detected in UC-MSCs cultures at P3 after adipogenic and osteogenic induction; Oil Red O and Alizarin Red S staining, magnification  $\times 50$ .
